# Supplementary material for: Erebosis, a new cell death mechanism during homeostatic turnover of gut enterocytes
Source: PubMed Central journal article supplement (PMC9037934; doi:10.1371/journal.pbio.3001586), 2022-04-25

*CB>nls-mCherry**Myo1D>GFP*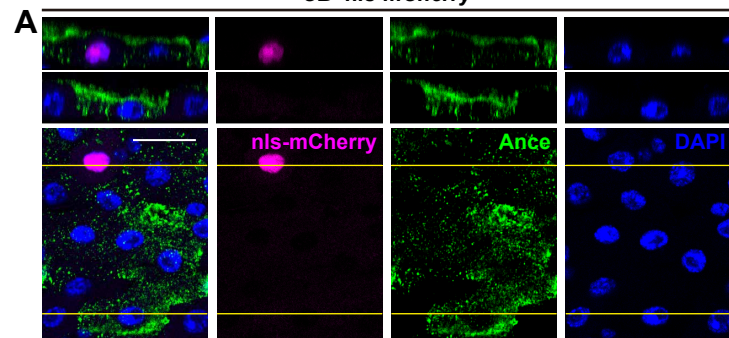*Myo1D>GFP, nlsRFP, tub-Gal80<sup>ts</sup>*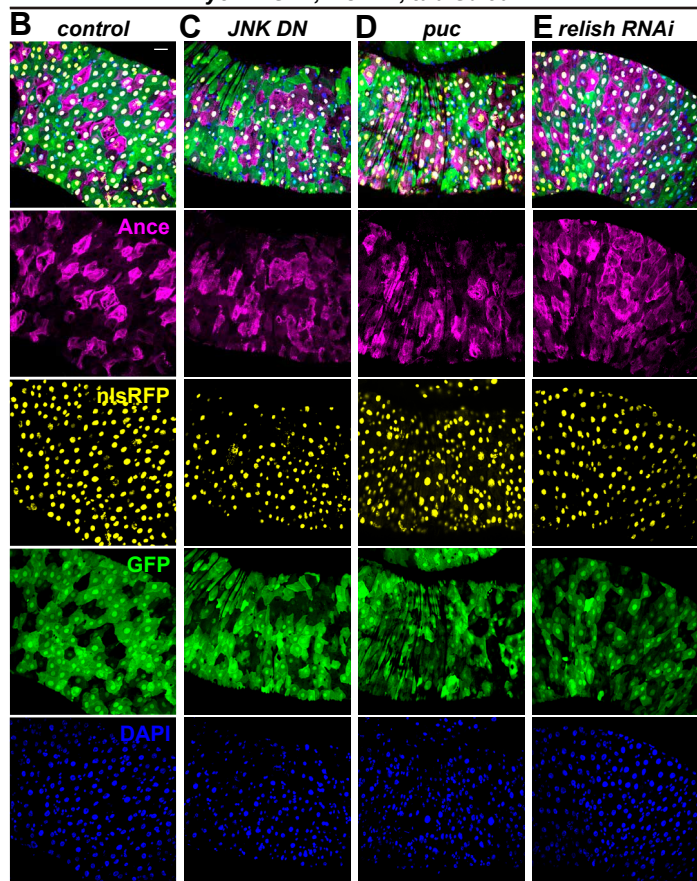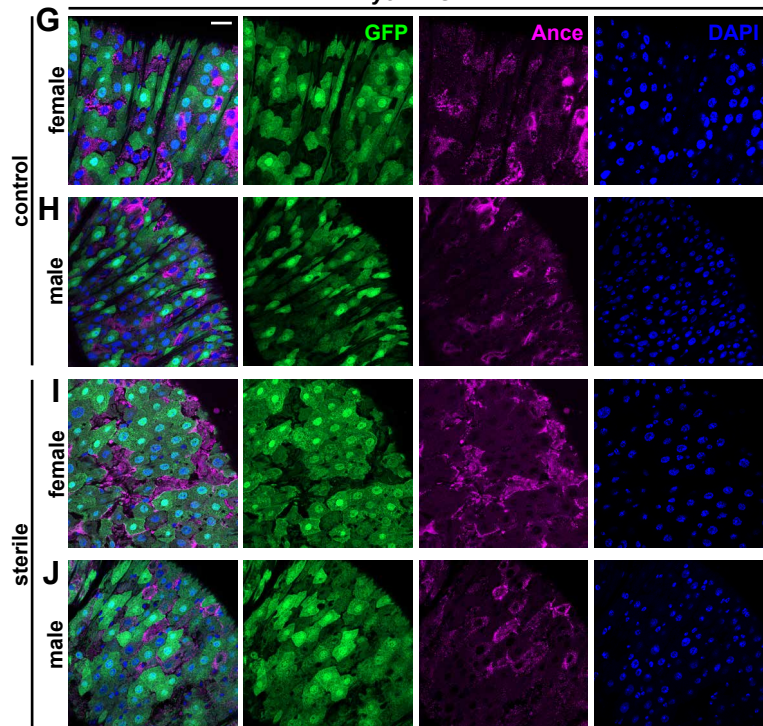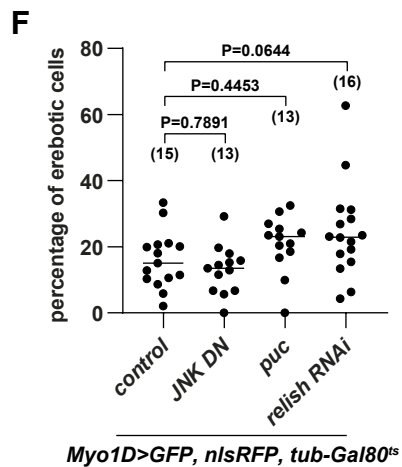

Supplement: pbio.3001586.s004.pdf [file pbio.3001586.s004.pdf]
