# Supplementary material for: Erebosis, a new cell death mechanism during homeostatic turnover of gut enterocytes
Source: PubMed Central journal article supplement (PMC9037934; doi:10.1371/journal.pbio.3001586), 2022-04-25

**Myo1D>GFP**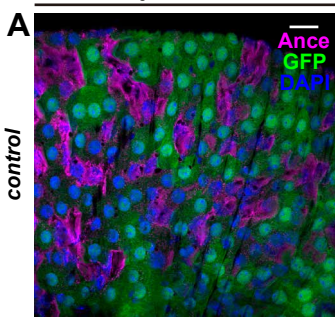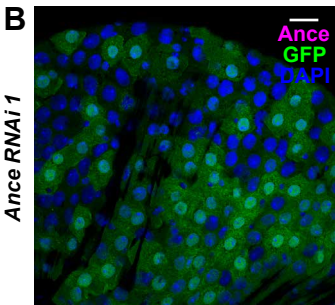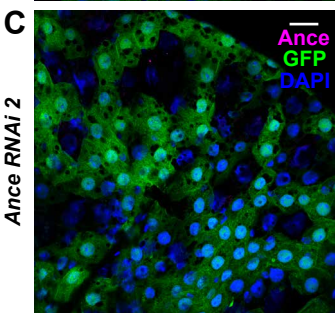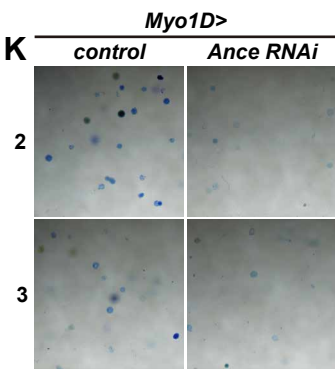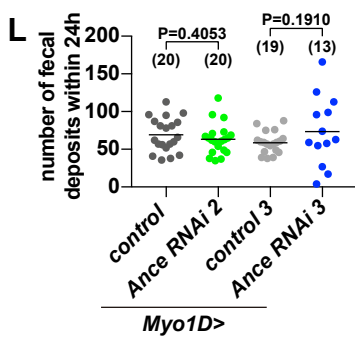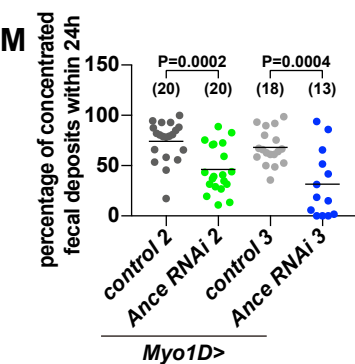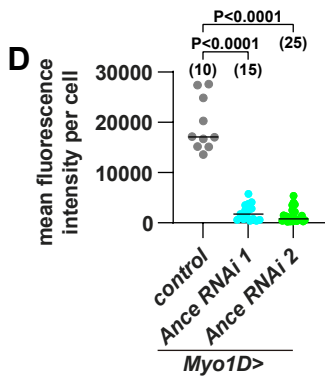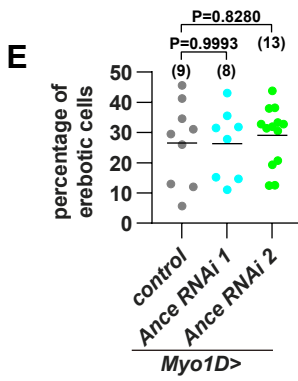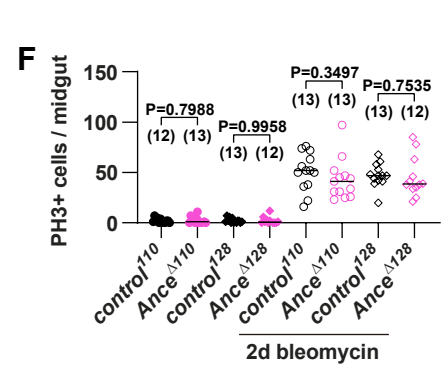**Myo1D>GFP, nlsRFP, tub-Gal80<sup>ts</sup>**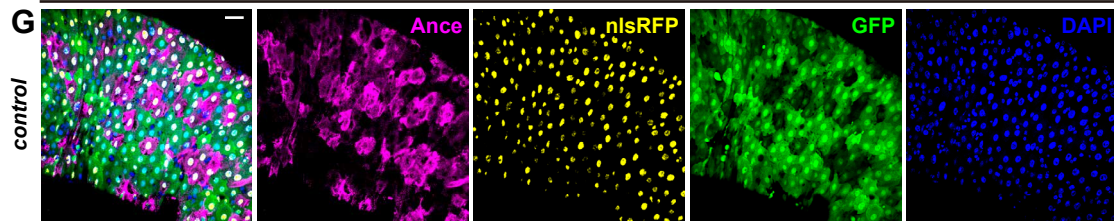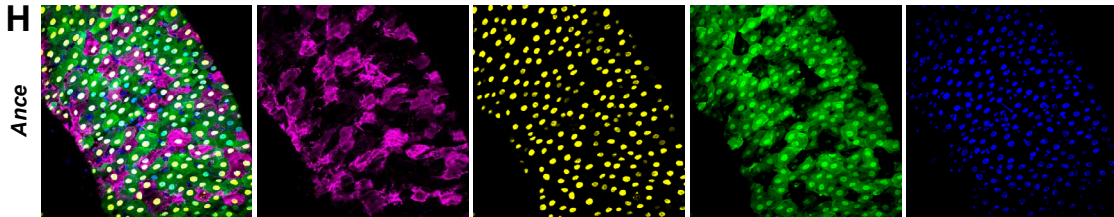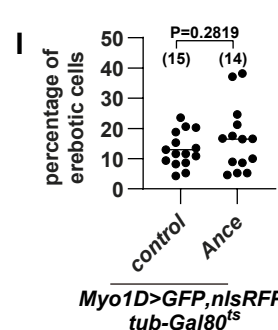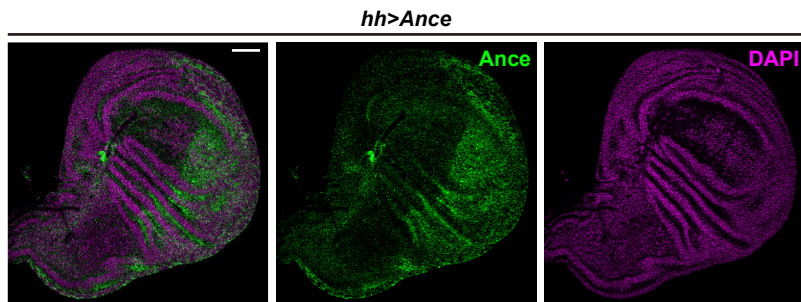**Ance>GFP**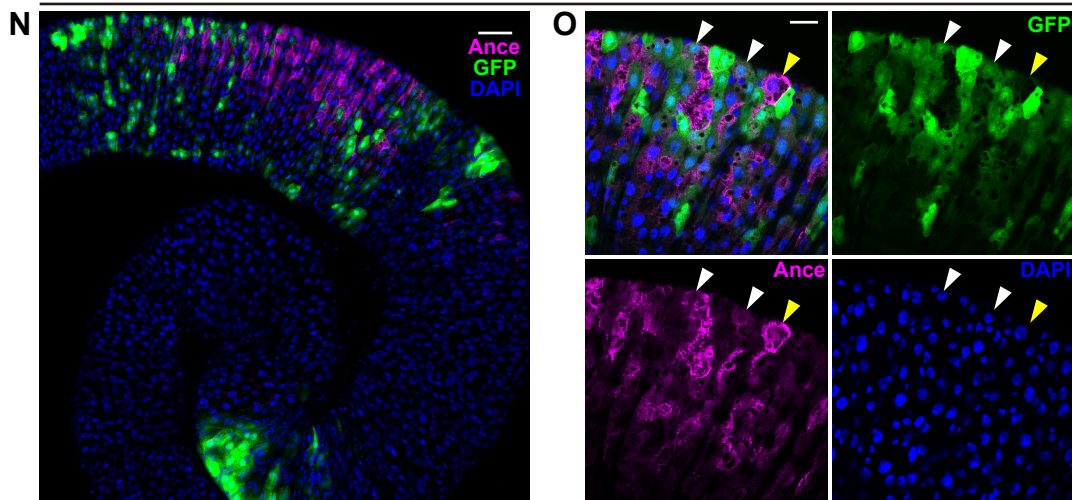**Ance<sup>ΔR2-A17</sup>**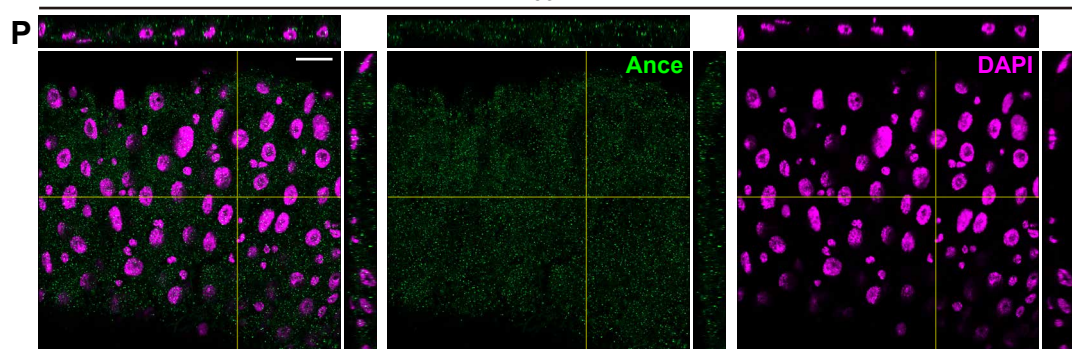

Supplement: pbio.3001586.s007.pdf [file pbio.3001586.s007.pdf]
